# Supplementary material for: Multiple chemical sensitivity scoping review protocol: overview of research and MCS construct
Source: PubMed Central journal article supplement — BMJ Open. 2023 Sep 22;13(9):e072098. doi: 10.1136/bmjopen-2023-072098 (PMC10533706; doi:10.1136/bmjopen-2023-072098), 2023-09-22
Supplement: bmjopen-2023-072098supp001.pdf [file bmjopen-2023-072098supp001.pdf]

# Appendix: Search Strategies

Multiple Chemical Sensitivity Scoping Review Protocol

## PubMed

"multiple chemical sensitivity"[MeSH Terms] OR ("multiple"[Title/Abstract] AND "chemical"[Title/Abstract] AND "sensitivity"[Title/Abstract]) OR "multiple chemical sensitivity"[Title/Abstract] OR ("multiple"[Title/Abstract] AND "chemical"[Title/Abstract] AND "sensitivities"[Title/Abstract]) OR "multiple chemical sensitivities"[Title/Abstract] OR "MCS syndrome"[Title/Abstract] OR "chemical intolerance"[Title/Abstract] OR "chemically intolerant"[Title/Abstract] OR "chemical hypersensitivity"[Title/Abstract] OR "chemical AIDS"[Title/Abstract] OR "chemical sensitivity disorder"[Title/Abstract] OR "chemical sensitivity syndromes"[Title/Abstract] OR "chemophobia"[Title/Abstract] OR "environmental chemical odor intolerance"[Title/Abstract] OR "sensitivity to environmental chemicals"[Title/Abstract] OR ("chemical"[Title/Abstract] AND "environmental illness"[Title/Abstract]) OR "chemically induced environmental illnesses"[Title/Abstract] OR "total allergy syndrome"[Title/Abstract] OR "twentieth century disease"[Title/Abstract] OR "20th century disease"[Title/Abstract] OR "building-related illness"[Title/Abstract] OR "toxicant induced loss of tolerance"[Title/Abstract] OR "Toxicant-Induced Loss of Tolerance"[Title/Abstract] OR "mast cell activation syndrome"[Title/Abstract] OR "idiopathic environmental intolerance"[Title/Abstract] OR "idiopathic environmental intolerances"[Title/Abstract] OR "idiopathic environmental illness"[Title/Abstract] OR "symptoms associated with environmental factors"[Title/Abstract]

Limit: English language

**Agricultural & Environmental Science Collection**

(noft("multiple chemical sensitivity" OR "multiple chemical sensitivities" OR "MCS syndrome") OR noft("chemical intolerance" OR "chemically intolerant" OR "chemical hypersensitivity" OR "chemical AIDS" OR "chemical sensitivity disorder" OR "chemical sensitivity syndromes" OR "chemophobia") OR noft("environmental chemical odor intolerance" OR "sensitivity to environmental chemicals" OR ("chemical" AND "environmental illness") OR "chemically induced environmental illnesses") OR noft("total allergy syndrome") OR noft("twentieth century disease" OR "20th century disease" OR "building-related illness") OR noft("toxicant induced loss of tolerance" OR "Toxicant-Induced Loss of Tolerance") OR noft("mast cell activation syndrome") OR noft("idiopathic environmental intolerance" OR "idiopathic environmental intolerances" OR "idiopathic environmental illness" OR "symptoms associated with environmental factors"))

AND

(stpe.exact("Scholarly Journals" OR "Other Sources" OR "Reports"))

AND

la.exact("ENG"))

**BIOSIS**

"multiple chemical sensitivity" OR "multiple chemical sensitivities" OR "MCS syndrome" (Topic) OR "chemical intolerance" OR "chemically intolerant" OR "chemical hypersensitivity" OR "chemical AIDS" OR "chemical sensitivity disorder" OR "chemical sensitivity syndromes" OR "chemophobia" (Topic) OR "environmental chemical odor intolerance" OR "sensitivity to

environmental chemicals" OR ("chemical" AND "environmental illness") OR "chemically induced environmental illnesses" (Topic) OR "total allergy syndrome" (Topic) OR "twentieth century disease" OR "20th century disease" OR "building-related illness" (Topic) OR "toxicant induced loss of tolerance" OR "Toxicant-Induced Loss of Tolerance" (Topic) OR "mast cell activation syndrome" (Topic) OR "idiopathic environmental intolerance" OR "idiopathic environmental intolerances" OR "idiopathic environmental illness" (Topic) OR "symptoms associated with environmental factors" (Topic)

AND Article (Document Types)

AND English (Languages)

## **CINAHL**

TI ( "multiple chemical sensitivity" OR "multiple chemical sensitivities" OR "MCS syndrome" OR "chemical intolerance" OR "chemically intolerant" OR "chemical hypersensitivity" OR "chemical AIDS" OR "chemical sensitivity disorder" OR "chemical sensitivity syndromes" OR "chemophobia" OR "environmental chemical odor intolerance" OR "sensitivity to environmental chemicals" OR ("chemical" AND "environmental illness") OR "chemically induced environmental illnesses" OR "total allergy syndrome" OR "twentieth century disease" OR "20th century disease" OR "building-related illness" OR "toxicant induced loss of tolerance" OR "Toxicant-Induced Loss of Tolerance" OR "mast cell activation syndrome" OR "idiopathic environmental intolerance" OR "idiopathic environmental intolerances" OR "idiopathic environmental illness" ) OR SU ( "multiple chemical sensitivity" OR "multiple chemical sensitivities" OR "MCS syndrome" OR "chemical intolerance" OR "chemically intolerant" OR "chemical hypersensitivity" OR "chemical AIDS" OR "chemical sensitivity disorder" OR

"chemical sensitivity syndromes" OR "chemophobia" OR "environmental chemical odor intolerance" OR "sensitivity to environmental chemicals" OR ("chemical" AND "environmental illness") OR "chemically induced environmental illnesses" OR "total allergy syndrome" OR "twentieth century disease" OR "20th century disease" OR "building-related illness" OR "toxicant induced loss of tolerance" OR "Toxicant-Induced Loss of Tolerance" OR "mast cell activation syndrome" OR "idiopathic environmental intolerance" OR "idiopathic environmental intolerances" OR "idiopathic environmental illness" ) OR AB ( "multiple chemical sensitivity" OR "multiple chemical sensitivities" OR "MCS syndrome" OR "chemical intolerance" OR "chemically intolerant" OR "chemical hypersensitivity" OR "chemical AIDS" OR "chemical sensitivity disorder" OR "chemical sensitivity syndromes" OR "chemophobia" OR "environmental chemical odor intolerance" OR "sensitivity to environmental chemicals" OR ("chemical" AND "environmental illness") OR "chemically induced environmental illnesses" OR "total allergy syndrome" OR "twentieth century disease" OR "20th century disease" OR "building-related illness" OR "toxicant induced loss of tolerance" OR "Toxicant-Induced Loss of Tolerance" OR "mast cell activation syndrome" OR "idiopathic environmental intolerance" OR "idiopathic environmental intolerances" OR "idiopathic environmental illness" OR "symptoms associated with environmental factors")

AND

English language

### **Current Contents**

"multiple chemical sensitivity" OR "multiple chemical sensitivities" OR "MCS syndrome" OR "chemical intolerance" OR "chemically intolerant" OR "chemical hypersensitivity" OR

"chemical AIDS" OR "chemical sensitivity disorder" OR "chemical sensitivity syndromes" OR "chemophobia" OR "environmental chemical odor intolerance" OR "sensitivity to environmental chemicals" OR ("chemical" AND "environmental illness") OR "chemically induced environmental illnesses" OR "total allergy syndrome" OR "twentieth century disease" OR "20th century disease" OR "building-related illness" OR "toxicant induced loss of tolerance" OR "Toxicant-Induced Loss of Tolerance" OR "mast cell activation syndrome" OR "idiopathic environmental intolerance" OR "idiopathic environmental intolerances" OR "idiopathic environmental illness" (Topic) OR "symptoms associated with environmental factors" (Topic) and English (Language) and Article or Review Article or Correction (Document Types)

## **EMBASE**

('multiple chemical sensitivity':ti,ab,kw OR 'multiple chemical sensitivities':ti,ab,kw OR 'mcs syndrome':ti,ab,kw OR 'chemical intolerance':ti,ab,kw OR 'chemically intolerant':ti,ab,kw OR 'chemical hypersensitivity':ti,ab,kw OR 'chemical aids':ti,ab,kw OR 'chemical sensitivity disorder':ti,ab,kw OR 'chemical sensitivity syndromes':ti,ab,kw OR 'chemophobia':ti,ab,kw OR 'environmental chemical odor intolerance':ti,ab,kw OR 'sensitivity to environmental chemicals':ti,ab,kw OR ('chemical':ti,ab,kw AND 'environmental illness':ti,ab,kw) OR 'chemically induced environmental illnesses':ti,ab,kw OR 'total allergy syndrome':ti,ab,kw OR 'twentieth century disease':ti,ab,kw OR '20th century disease':ti,ab,kw OR 'building-related illness':ti,ab,kw OR 'toxicant induced loss of tolerance':ti,ab,kw OR 'toxicant-induced loss of

tolerance':ti,ab,kw OR 'mast cell activation syndrome':ti,ab,kw OR 'idiopathic environmental intolerance':ti,ab,kw OR 'idiopathic environmental intolerances':ti,ab,kw OR 'idiopathic environmental illness':ti,ab,kw OR symptoms associated with environmental factors':ti,ab,kw)

AND

english:la

AND

('article'/it OR 'review'/it)

### **Environment Index**

TI ( "multiple chemical sensitivity" OR "multiple chemical sensitivities" OR "MCS syndrome" OR "chemical intolerance" OR "chemically intolerant" OR "chemical hypersensitivity" OR "chemical AIDS" OR "chemical sensitivity disorder" OR "chemical sensitivity syndromes" OR "chemophobia" OR "environmental chemical odor intolerance" OR "sensitivity to environmental chemicals" OR ("chemical" AND "environmental illness") OR "chemically induced environmental illnesses" OR "total allergy syndrome" OR "twentieth century disease" OR "20th century disease" OR "building-related illness" OR "toxicant induced loss of tolerance" OR "Toxicant-Induced Loss of Tolerance" OR "mast cell activation syndrome" OR "idiopathic environmental intolerance" OR "idiopathic environmental intolerances" OR "idiopathic environmental illness" ) OR SU ( "multiple chemical sensitivity" OR "multiple chemical sensitivities" OR "MCS syndrome" OR "chemical intolerance" OR "chemically intolerant" OR "chemical hypersensitivity" OR "chemical AIDS" OR "chemical sensitivity disorder" OR "chemical sensitivity syndromes" OR "chemophobia" OR "environmental chemical odor intolerance" OR "sensitivity to environmental chemicals" OR ("chemical" AND "environmental

illness") OR "chemically induced environmental illnesses" OR "total allergy syndrome" OR "twentieth century disease" OR "20th century disease" OR "building-related illness" OR "toxicant induced loss of tolerance" OR "Toxicant-Induced Loss of Tolerance" OR "mast cell activation syndrome" OR "idiopathic environmental intolerance" OR "idiopathic environmental intolerances" OR "idiopathic environmental illness" ) OR AB ( "multiple chemical sensitivity" OR "multiple chemical sensitivities" OR "MCS syndrome" OR "chemical intolerance" OR "chemically intolerant" OR "chemical hypersensitivity" OR "chemical AIDS" OR "chemical sensitivity disorder" OR "chemical sensitivity syndromes" OR "chemophobia" OR "environmental chemical odor intolerance" OR "sensitivity to environmental chemicals" OR ("chemical" AND "environmental illness") OR "chemically induced environmental illnesses" OR "total allergy syndrome" OR "twentieth century disease" OR "20th century disease" OR "building-related illness" OR "toxicant induced loss of tolerance" OR "Toxicant-Induced Loss of Tolerance" OR "mast cell activation syndrome" OR "idiopathic environmental intolerance" OR "idiopathic environmental intolerances" OR "idiopathic environmental illness" OR "symptoms associated with environmental factors")

AND

English language

### **Environmental Science**

(noft("multiple chemical sensitivity" OR "multiple chemical sensitivities" OR "MCS syndrome" OR "chemical intolerance" OR "chemically intolerant" OR "chemical hypersensitivity" OR "chemical AIDS" OR "chemical sensitivity disorder" OR "chemical sensitivity syndromes" OR "chemophobia" OR "environmental chemical odor intolerance" OR "sensitivity to environmental

chemicals" OR ("chemical" AND "environmental illness") OR "chemically induced environmental illnesses" OR "total allergy syndrome" OR "twentieth century disease" OR "20th century disease" OR "building-related illness" OR "toxicant induced loss of tolerance" OR "Toxicant-Induced Loss of Tolerance" OR "mast cell activation syndrome" OR "idiopathic environmental intolerance" OR "idiopathic environmental intolerances" OR "idiopathic environmental illness" OR "symptoms associated with environmental factors") AND stype.exact("Reports" OR "Working Papers" OR "Scholarly Journals") AND la.exact("English")) AND stype.exact("Reports" OR "Working Papers" OR "Scholarly Journals")

And

Source Type: Reports, Scholarly Journals, Working Papers

AND

Language: English

### **Healthcare Administration**

noft("multiple chemical sensitivity" OR "multiple chemical sensitivities" OR "MCS syndrome" OR "chemical intolerance" OR "chemically intolerant" OR "chemical hypersensitivity" OR "chemical AIDS" OR "chemical sensitivity disorder" OR "chemical sensitivity syndromes" OR "chemophobia" OR "environmental chemical odor intolerance" OR "sensitivity to environmental chemicals" OR ("chemical" AND "environmental illness") OR "chemically induced environmental illnesses" OR "total allergy syndrome" OR "twentieth century disease" OR "20th century disease" OR "building-related illness" OR "toxicant induced loss of tolerance" OR "Toxicant-Induced Loss of Tolerance" OR "mast cell activation syndrome" OR "idiopathic



environmental intolerance" OR "idiopathic environmental intolerances" OR "idiopathic environmental illness" OR "symptoms associated with environmental factors")Limits applied

AND

Source type: Reports, Scholarly Journals

AND

Language: English

### **HERO**

"multiple chemical sensitivity" OR "multiple chemical sensitivities" OR "MCS syndrome" OR "chemical intolerance" OR "chemically intolerant" OR "chemical hypersensitivity" OR "chemical AIDS" OR "chemical sensitivity disorder" OR "chemical sensitivity syndromes" OR "chemophobia" OR "environmental chemical odor intolerance" OR "sensitivity to environmental chemicals" OR ("chemical" AND "environmental illness") OR "chemically induced environmental illnesses" OR "total allergy syndrome" OR "twentieth century disease" OR "20th century disease" OR "building-related illness" OR "mast cell activation syndrome" OR "idiopathic environmental intolerance" OR "idiopathic environmental intolerances" OR "idiopathic environmental illness" OR "symptoms associated with environmental factors"

AND

Language: English

### **PsycINFO**

(noft("multiple chemical sensitivity" OR "multiple chemical sensitivities" OR "MCS syndrome") OR noft("chemical intolerance" OR "chemically intolerant" OR "chemical hypersensitivity" OR

"chemical AIDS" OR "chemical sensitivity disorder" OR "chemical sensitivity syndromes" OR "chemophobia") OR noft("environmental chemical odor intolerance" OR "sensitivity to environmental chemicals" OR ("chemical" AND "environmental illness") OR "chemically induced environmental illnesses") OR noft("total allergy syndrome") OR noft("twentieth century disease" OR "20th century disease" OR "building-related illness") OR noft("toxicant induced loss of tolerance" OR "Toxicant-Induced Loss of Tolerance") OR noft("mast cell activation syndrome") OR noft("idiopathic environmental intolerance" OR "idiopathic environmental intolerances" OR "idiopathic environmental illness" OR "symptoms associated with environmental factors"))

AND

(la.exact("ENG"))

AND

styp.e.exact("Scholarly Journals"))

### **SciFinder**

"multiple chemical sensitivity" OR "multiple chemical sensitivities" OR "chemical intolerance" OR "chemically intolerant" OR "chemical hypersensitivity" OR "chemical AIDS" OR "chemical sensitivity disorder" OR "chemical sensitivity syndromes" OR "chemophobia" OR "environmental chemical odor intolerance" OR "sensitivity to environmental chemicals" OR ("chemical" AND "environmental illness") OR "chemically induced environmental illnesses" OR "total allergy syndrome" OR "twentieth century disease" OR "20th century disease" OR "building-related illness" OR "toxicant induced loss of tolerance" OR "Toxicant-Induced Loss of Tolerance" OR "mast cell activation syndrome" OR "idiopathic environmental intolerance" OR

"idiopathic environmental intolerances" OR "idiopathic environmental illness" OR "symptoms associated with environmental factors"

AND

English language

AND

Exclude: Patent, Book, Commentary, Conference, Dissertation, Editorial, Letter

### SCOPUS

( TITLE-ABS-KEY ( "multiple chemical sensitivity" OR "multiple chemical sensitivities" OR "MCS syndrome" OR "chemical intolerance" OR "chemically intolerant" OR "chemical hypersensitivity" OR "chemical AIDS" OR "chemical sensitivity disorder" OR "chemical sensitivity syndromes" OR "chemophobia" OR "environmental chemical odor intolerance" OR "sensitivity to environmental chemicals" OR ( "chemical" AND "environmental illness" ) OR "chemically induced environmental illnesses" OR "total allergy syndrome" OR "twentieth century disease" OR "20th century disease" OR "building-related illness" OR "toxicant induced loss of tolerance" OR "Toxicant-Induced Loss of Tolerance" OR "mast cell activation syndrome" OR "idiopathic environmental intolerance" OR "idiopathic environmental intolerances" OR "idiopathic environmental illness" OR "symptoms associated with environmental factors" )

AND

(LIMIT-TO (DOCTYPE, "ar") OR LIMIT-TO (DOCTYPE, "re"))

AND

(LIMIT-TO ( LANGUAGE, "English" ) )

**Web of Science**

"multiple chemical sensitivity" OR "multiple chemical sensitivities" OR "MCS syndrome" OR  
"chemical intolerance" OR "chemically intolerant" OR "chemical hypersensitivity" OR  
"chemical AIDS" OR "chemical sensitivity disorder" OR "chemical sensitivity syndromes" OR  
"chemophobia" OR "environmental chemical odor intolerance" OR "sensitivity to environmental  
chemicals" OR ("chemical" AND "environmental illness") OR "chemically induced  
environmental illnesses" OR "total allergy syndrome" OR "twentieth century disease" OR "20th  
century disease" OR "building-related illness" OR "toxicant induced loss of tolerance" OR  
"Toxicant-Induced Loss of Tolerance" OR "mast cell activation syndrome" OR "idiopathic  
environmental intolerance" OR "idiopathic environmental intolerances" OR "idiopathic  
environmental illness" OR "symptoms associated with environmental factors" (Topic)

AND

English (Language)

AND

Article or Review Article (Document Types)
